# Supplementary material
Source: publisher site journal article supplement (https://www.dovepress.com/article/supplementary_file/575900/575900%20Table%20S1-S2.docx)
Supplement: Supplementary file 1 [file 575900%20Table%20S1-S2.docx]

**Table S1**. Clinical and biochemical characteristics across quartile of VAI

| Variables | Q1（n=238） | Q2（n=240） | Q3（n=238） | Q4（n=239） | *P* for trend |
| --- | --- | --- | --- | --- | --- |
| Anthropometric parameters | | | | | |
| Height (cm) | 160.34±5.17 | 161.04±5.1 | 161.8±5.06 | 161.61±4.94 | **0.001** |
| Weight (kg) | 55.75±9.68 | 60.69±10.51 | 67.09±12.91 | 68.51±11.91 | **<0.001** |
| HC (cm) | 93.82±7.22 | 97.46±7.98 | 100.5±9.19 | 101.67±7.73 | **<0.001** |
| SBP (mmHg) | 109.67±9.94 | 111.27±9.04 | 113.81±9.06 | 114.46±8.53 | **<0.001** |
| DBP (mmHg) | 72.89±7.71 | 74.58±7.67 | 75.76±8.26 | 76.02±7.33 | **<0.001** |
| Mean menstrual cycle (day) | 64.75±33.39 | 66.95±36.34 | 75.8±55.03 | 70.49±42.24 | 0.264 |
| Hirsutism score | 3.11±2.77 | 2.77±2.57 | 3.08±2.99 | 3.1±2.75 | 0.837 |
| Acne score | 0.46±0.76 | 0.53±0.88 | 0.42±0.72 | 0.33±0.66 | **0.032** |
| Acanthosis nigricans score | 1.12±0.35 | 1.14±0.42 | 1.24±0.5 | 1.31±0.58 | **<0.001** |
| Biochemical parameters | | | | | |
| FINS (pmol/L) | 58.18±55.13 | 76.69±55.97 | 105.35±93.78 | 142.79±110.89 | **<0.001** |
| HOMA-IR | 1.87±2.1 | 2.56±2.14 | 3.63±3.89 | 5±4.84 | **<0.001** |
| QUICKI | 0.16±0.02 | 0.15±0.02 | 0.15±0.02 | 0.14±0.02 | **<0.001** |
| ApoA1 (g/L) | 1.66±0.32 | 1.52±0.3 | 1.46±0.29 | 1.39±0.29 | **<0.001** |
| ApoB (g/L) | 0.73±0.18 | 0.83±0.24 | 0.96±0.26 | 1.08±0.31 | **<0.001** |
| ApoB/ApoA1 | 0.45±0.11 | 0.55±0.15 | 0.67±0.17 | 0.79±0.19 | **<0.001** |
| LP (mg/L) | 129.89±111.56 | 134.15±102.48 | 128.7±98.81 | 125.71±85.21 | 0.354 |
| Sex hormones | | | | | |
| P (nmol/L) | 3.2±7.31 | 2.52±4.3 | 2.29±3.39 | 2.14±2.9 | **<0.001** |
| E2 (pmol/L) | 310.97±371.92 | 259.56±229.77 | 242.85±236.05 | 264.5±394.22 | **0.001** |
| TT (nmol/L) | 1.71±0.58 | 1.68±0.69 | 1.61±0.64 | 1.67±0.67 | 0.247 |
| FAI | 4.03±2.9 | 5.13±3.69 | 6.31±4.47 | 7.93±5.34 | **<0.001** |
| LH/FSH ratio | 1.92±1.08 | 1.93±1.48 | 1.69±0.97 | 1.59±0.89 | **<0.001** |
| AMH (ng/mL) | 13.22±6.29 | 12.81±6.81 | 11.72±6.42 | 10.52±5.52 | **<0.001** |
| Hepatic and renal function profiles and cardiac biomarkers | | | | | |
| TB (μmol/L) | 7.25±3.68 | 6.24±2.86 | 6.22±2.87 | 5.86±3.03 | **<0.001** |
| DB (μmol/L) | 2.68±1.59 | 2.29±1.22 | 2.32±1.32 | 1.88±1.43 | **<0.001** |
| IDB (μmol/L) | 4.58±2.29 | 3.96±1.88 | 3.9±1.86 | 4.17±2.15 | 0.058 |
| TBA (μmol/L) | 2.28±3.44 | 2.16±4 | 1.76±1.84 | 1.67±1.85 | **0.001** |
| B2M (mg/L) | 1.27±0.37 | 1.31±0.4 | 1.31±0.39 | 1.35±0.41 | **0.014** |
| CysC(mg/L) | 0.46±0.15 | 0.45±0.14 | 0.46±0.16 | 0.49±0.15 | **0.010** |
| HCY (μmol/L) | 7.97±4.21 | 8.13±4.84 | 8.62±5.56 | 8.57±4.66 | 0.105 |
| CK (U/L) | 57.8±41.53 | 53.16±26.72 | 55.38±28.6 | 56.43±27.59 | 0.703 |
| **Notes:** Data are expressed as mean ± SD. The p-value <0.05 is highlighted in bold.  **Abbreviations:** n, number of participants; P, P value; HC, hip circumference; SBP, systolic blood pressure; DBP, diastolic blood pressure; FINS, fasting insulin; HOMA-IR, homeostasis model assessment-insulin resistance; QUICKI, quantitative insulin sensitivity check index; ApoA1, apolipoprotein a1; ApoB, apolipoprotein b; LP, lipoprotein(a); P, progesterone; E2, estradiol; TT, total testosterone; FAI, free androgen index; AMH, anti-müllerian hormone; TB, total bilirubin; DB, direct bilirubin; IDB, indirect bilirubin; TBA, total bile acid; B2M, beta 2-microglobulin; CysC, cystatin C; HCY, homocysteine; CK, creatine kinase; cm, centimeter; kg, kilogram. | | | | | |

**Table S2.** Linear associations between the VAI and clinical and biochemical parameters

| Variables | Crude | | Adjusteda | |
| --- | --- | --- | --- | --- |
|  | Coefficient β | *P* | Coefficient β | *P* |
| HC (cm) | 0.291 | **<0.001** | 0.258 | **<0.001** |
| SBP (mmHg) | 0.158 | **<0.001** | 0.141 | **<0.001** |
| DBP (mmHg) | 0.122 | **<0.001** | 0.117 | **<0.001** |
| Acanthosis nigricans score | 0.170 | **<0.001** | 0.175 | **<0.001** |
| Mean menstrual cycle (day) | 0.077 | **0.018** | 0.075 | **0.022** |
| FINS (pmol/L) | 0.383 | **< 0.001** | 0.388 | **<0.001** |
| HOMA-IR | 0.358 | **<0.001** | 0.362 | **<0.001** |
| QUICKI | -0.360 | **<0.001** | -0.365 | **<0.001** |
| ApoA1 (g/L) | -0.276 | **<0.001** | -0.276 | **<0.001** |
| ApoB (g/L) | 0.386 | **<0.001** | 0.376 | **<0.001** |
| ApoB/ApoA1 | 0.554 | **<0.001** | 0.544 | **<0.001** |
| FAI | 0.246 | **<0.001** | 0.253 | **<0.001** |
| LH/FSH ratio | -0.116 | **<0.001** | -0.103 | **0.002** |
| AMH (ng/mL) | -0.166 | **<0.001** | -0.153 | **<0.001** |
| TB (μmol/L) | -0.111 | **0.001** | -0.111 | **0.001** |
| DB (μmol/L) | -0.193 | **<0.001** | -0.194 | **<0.001** |
| TBA (μmol/L) | -0.067 | **0.042** | -0.065 | 0.050 |
| B2M (mg/L) | 0.095 | **0.004** | 0.094 | **0.005** |
| CysC(mg/L) | 0.148 | **<0.001** | 0.140 | **<0.001** |
| **Notes:** aAdjusting for age. The p-value <0.05 is highlighted in bold.  **Abbreviations:** n, number of participants; P, P value; HC, hip circumference; SBP, systolic blood pressure; DBP, diastolic blood pressure; FINS, fasting insulin; HOMA-IR, homeostasis model assessment-insulin resistance; QUICKI, quantitative insulin sensitivity check index; ApoA1, apolipoprotein a1; ApoB, apolipoprotein b; FAI, free androgen index; LH, luteinizing hormone; FSH, follicle-stimulating hormone; AMH, anti-müllerian hormone; TB, total bilirubin; DB, direct bilirubin; TBA, total bile acid; B2M, beta 2-microglobulin; CysC, cystatin C; cm, centimeter; kg, kilogram. | | | | |
